# Supplementary material for: Positively Charged Residues Are the Major Determinants of Ribosomal Velocity
Source: PubMed Central journal article supplement (PMC3595205; doi:10.1371/journal.pbio.1001508), 2013-03-12
Supplement: pbio.1001508.s032.pdf [file pbio.1001508.s032.pdf]

**Table S12.**

|           |                                                                          | <b>q1<sub>Δr</sub></b><br><b>(count)</b> | <b>q2<sub>Δr</sub></b> | <b>q3<sub>Δr</sub></b> | <b>q4<sub>Δr</sub></b> | <b>χ<sup>2</sup> test P</b><br><b>value</b><br><b>(Bonferroni</b><br><b>correction)</b> |
|-----------|--------------------------------------------------------------------------|------------------------------------------|------------------------|------------------------|------------------------|-----------------------------------------------------------------------------------------|
| <b>A.</b> | <b>charge score 1</b><br><b>PARS score 1</b>                             | 40                                       | 32                     | 48                     | 29                     | 0.12                                                                                    |
|           | <b>charge score 1</b><br><b>PARS score -1</b>                            | 78                                       | 67                     | 82                     | 73                     | 0.64                                                                                    |
|           | <b>Binomial test P value</b><br><b>(Bonferroni</b><br><b>correction)</b> | 0.00060<br>(0.0024)                      | 0.00056<br>(0.0022)    | 0.0036<br>(0.014)      | 1.6e-05<br>(6.4e-05)   | -                                                                                       |
| <b>B.</b> | <b>charge score 0</b><br><b>PARS score 1</b>                             | 24                                       | 13                     | 12                     | 11                     | 0.062                                                                                   |
|           | <b>charge score 0</b><br><b>PARS score -1</b>                            | 86                                       | 77                     | 84                     | 61                     | 0.17                                                                                    |
|           | <b>Binomial test P value</b><br><b>(Bonferroni</b><br><b>correction)</b> | 2.2e-09<br>(8.9e-09)                     | 3.2e-12<br>(1.3e-11)   | 1.8e-14<br>(7.3e-14)   | 1.5e-09<br>(6.2e-09)   | -                                                                                       |
| <b>C.</b> | <b>charge score -1</b><br><b>PARS score 1</b>                            | 22                                       | 27                     | 21                     | 15                     | 0.33                                                                                    |
|           | <b>charge score -1</b><br><b>PARS score -1</b>                           | 44                                       | 37                     | 21                     | 23                     | 0.008<br>(0.016)                                                                        |
|           | <b>Binomial test P value</b><br><b>(Bonferroni</b><br><b>correction)</b> | 0.0092<br>(0.037)                        | 0.26                   | 1                      | 0.26                   | -                                                                                       |
| <b>D.</b> | <b>charge score 1</b><br><b>conservative PARS</b><br><b>score 1</b>      | 140                                      | 126                    | 163                    | 155                    | 0.14                                                                                    |
|           | <b>charge score 1</b><br><b>conservative PARS</b><br><b>score -1</b>     | 200                                      | 248                    | 233                    | 246                    | 0.095                                                                                   |
|           | <b>Binomial test P value</b><br><b>(Bonferroni</b><br><b>correction)</b> | 0.0013<br>(0.0052)                       | 2.8e-10<br>(1.1e-09)   | 0.00051<br>(0.0020)    | 6.4e-06<br>(2.6e-05)   | -                                                                                       |
| <b>E.</b> | <b>charge score 0</b><br><b>conservative PARS</b><br><b>score 1</b>      | 72                                       | 52                     | 52                     | 54                     | 0.18                                                                                    |
|           | <b>charge score 0</b><br><b>conservative PARS</b><br><b>score -1</b>     | 86                                       | 77                     | 84                     | 61                     | 0.17                                                                                    |
|           | <b>Binomial test P value</b><br><b>(Bonferroni</b><br><b>correction)</b> | 0.30                                     | 0.034<br>(0.14)        | 0.0076<br>(0.030)      | 0.58                   | -                                                                                       |
| <b>F.</b> | <b>charge score -1</b><br><b>conservative PARS</b><br><b>score 1</b>     | 90                                       | 94                     | 75                     | 85                     | 0.50                                                                                    |
|           | <b>charge score -1</b><br><b>conservative PARS</b><br><b>score -1</b>    | 121                                      | 111                    | 101                    | 108                    | 0.60                                                                                    |
|           | <b>Binomial test P value</b><br><b>(Bonferroni</b><br><b>correction)</b> | 0.039<br>(0.16)                          | 0.26                   | 0.060                  | 0.11                   | -                                                                                       |

**Table S12. The relationship of PARS score (double strandedness) to charge score.** Quantiles of the difference in average ribosomal occlusion between the two windows identified within a transcript are shown, with q1 representing the smallest differences and q4 the largest. A score of 1 indicates the putative retarding feature is more present within the more occluded intra-transcript window; -1, less present; 0, present in both windows in equal amounts.
