# Supplementary material for: Positively Charged Residues Are the Major Determinants of Ribosomal Velocity
Source: PubMed Central journal article supplement (PMC3595205; doi:10.1371/journal.pbio.1001508), 2013-03-12
Supplement: pbio.1001508.s033.pdf [file pbio.1001508.s033.pdf]

**Table S13.**

|                                                                |                                                                                                      | $q1_{\Delta r}$<br>(count)                   | $q2_{\Delta r}$                             | $q3_{\Delta r}$                             | $q4_{\Delta r}$                               | $\chi^2$ test P value<br>(Bonferroni<br>correction) |
|----------------------------------------------------------------|------------------------------------------------------------------------------------------------------|----------------------------------------------|---------------------------------------------|---------------------------------------------|-----------------------------------------------|-----------------------------------------------------|
| <b>A.</b><br>charge score                                      | 1                                                                                                    | 578                                          | 630                                         | 700                                         | 766                                           | 1.3e-06 (3.8e-06)                                   |
|                                                                | 0                                                                                                    | 270                                          | 256                                         | 255                                         | 242                                           | 0.67                                                |
|                                                                | -1                                                                                                   | 496                                          | 457                                         | 388                                         | 335                                           | 5.2e-08 (1.6e-07)                                   |
|                                                                | Binomial test<br>on +1 and -1<br>charge score<br>counts, P<br>value<br>(Bonferroni<br>correction)    | 0.013<br>(0.052)                             | 1.7e-07<br>(6.8e-07)                        | < 2.2e-16<br>(8.8e-16)                      | < 2.2e-16<br>(8.8e-16)                        | -                                                   |
| <b>B.</b><br>tAI score                                         | 1                                                                                                    | 576                                          | 600                                         | 601                                         | 551                                           | 0.41                                                |
|                                                                | 0                                                                                                    | 0                                            | 0                                           | 0                                           | 0                                             | -                                                   |
|                                                                | -1                                                                                                   | 768                                          | 743                                         | 742                                         | 792                                           | 0.53                                                |
|                                                                | Binomial test<br>on +1 and -1<br>tAI score<br>counts, P<br>value<br>(Bonferroni<br>correction)       | 1.8e-07<br>(7.2e-07)                         | 0.00011<br>(0.00042)                        | 0.00013<br>(0.00053)                        | 5.2e-11<br>(2.1e-10)                          | -                                                   |
| <b>C.</b><br>rare pair<br>score<br><i>rare 6-mer<br/>score</i> | 1                                                                                                    | 180<br>257                                   | 184<br>205                                  | 160<br>177                                  | 92<br>115                                     | 9.9e-08 (3.0e-07)<br>4.8e-12 (1.4e-11)              |
|                                                                | 0                                                                                                    | 904<br>712                                   | 907<br>711                                  | 958<br>730                                  | 1101<br>868                                   | 7.6e-06 (2.3e-05)<br>4.6e-05 (0.00014)              |
|                                                                | -1                                                                                                   | 260<br>375                                   | 252<br>427                                  | 225<br>436                                  | 150<br>360                                    | 2.0e-07 (6.0e-07)<br>0.014 (0.042)                  |
|                                                                | Binomial test<br>on +1 and -1<br>rare pair<br>score counts,<br>P value<br>(Bonferroni<br>correction) | 0.00016<br>(0.00064)<br>3.1e-06<br>(1.2e-05) | 0.0013<br>(0.0052)<br><2.2e-16<br>(8.8e-16) | 0.0011<br>(0.0044)<br><2.2e-16<br>(8.8e-16) | 0.00023<br>(0.00092)<br><2.2e-16<br>(8.8e-16) | -                                                   |
| <b>C.</b><br>PARS score<br><i>conservative<br/>PARS score</i>  | 1                                                                                                    | 88<br>301                                    | 88<br>269                                   | 88<br>289                                   | 59<br>304                                     | 0.05<br>0.46                                        |
|                                                                | 0                                                                                                    | 491<br>0                                     | 510<br>0                                    | 516<br>0                                    | 554<br>0                                      | 0.26<br>-                                           |
|                                                                | -1                                                                                                   | 155<br>433                                   | 136<br>465                                  | 130<br>445                                  | 121<br>430                                    | 0.21<br>0.64                                        |
|                                                                | Binomial test<br>on +1 and -1<br>rare pair<br>score counts,<br>P value<br>(Bonferroni<br>correction) | 2.1e-05<br>(8.2e-05)<br>1.2e-06<br>(5.0e-05) | 0.0016<br>(0.0065)<br>4.5e-13<br>(1.8e-12)  | 0.0054<br>(0.022)<br>9.4e-09<br>(4.4e-06)   | 4.4e-06<br>(1.8e-05)<br>3.8e-06<br>(1.5e-05)  | -                                                   |

**Table S13. Table 1 done again, allowing the lower-occupancy window to have a ribosomal occupancy of 0.**
