# Supplementary material for: Positively Charged Residues Are the Major Determinants of Ribosomal Velocity
Source: PLoS Biol. 2013 Mar 12;11(3):e1001508. doi: 10.1371/journal.pbio.1001508 (PMC3595205; doi:10.1371/journal.pbio.1001508)
Supplement: Table S14 — Table 1 done again on the non-redundant footprint location set. (PDF) [file pbio.1001508.s034.pdf]

Table S14.

|                                                                                    |                                                                                                                                                       | <b>q1<sub>Δr</sub></b><br><b>(count)</b>                                 | <b>q2<sub>Δr</sub></b>                                                   | <b>q3<sub>Δr</sub></b>                                                 | <b>q4<sub>Δr</sub></b>                                                   | <b>χ<sup>2</sup> test P value</b><br><b>(Bonferroni</b><br><b>correction)</b> |
|------------------------------------------------------------------------------------|-------------------------------------------------------------------------------------------------------------------------------------------------------|--------------------------------------------------------------------------|--------------------------------------------------------------------------|------------------------------------------------------------------------|--------------------------------------------------------------------------|-------------------------------------------------------------------------------|
| <b>A.</b><br><b>charge score</b>                                                   | <b>1</b>                                                                                                                                              | <b>571</b>                                                               | <b>591</b>                                                               | <b>637</b>                                                             | <b>708</b>                                                               | <b>0.00051 (0.0015)</b>                                                       |
|                                                                                    | <b>0</b>                                                                                                                                              | <b>267</b>                                                               | <b>241</b>                                                               | <b>256</b>                                                             | <b>213</b>                                                               | <b>0.08</b>                                                                   |
|                                                                                    | <b>-1</b>                                                                                                                                             | <b>419</b>                                                               | <b>425</b>                                                               | <b>363</b>                                                             | <b>336</b>                                                               | <b>0.0022 (0.0065)</b>                                                        |
|                                                                                    | <b>Binomial test</b><br><b>on +1 and -1</b><br><b>charge score</b><br><b>counts, P</b><br><b>value</b><br><b>(Bonferroni</b><br><b>correction)</b>    | <b>1.5e-06</b><br><b>(6.0e-06)</b>                                       | <b>2.1e-07</b><br><b>(8.4e-07)</b>                                       | <b>&lt; 2.2e-16</b><br><b>(8.8e-16)</b>                                | <b>&lt; 2.2e-16</b><br><b>(8.8e-16)</b>                                  | <b>-</b>                                                                      |
| <b>B.</b><br><b>tAI score</b>                                                      | <b>1</b>                                                                                                                                              | <b>595</b>                                                               | <b>589</b>                                                               | <b>573</b>                                                             | <b>539</b>                                                               | <b>0.35</b>                                                                   |
|                                                                                    | <b>0</b>                                                                                                                                              | <b>0</b>                                                                 | <b>0</b>                                                                 | <b>0</b>                                                               | <b>0</b>                                                                 | <b>-</b>                                                                      |
|                                                                                    | <b>-1</b>                                                                                                                                             | <b>662</b>                                                               | <b>668</b>                                                               | <b>683</b>                                                             | <b>718</b>                                                               | <b>0.45</b>                                                                   |
|                                                                                    | <b>Binomial test</b><br><b>on +1 and -1</b><br><b>tAI score</b><br><b>counts, P</b><br><b>value</b><br><b>(Bonferroni</b><br><b>correction)</b>       | <b>0.06 (0.24)</b>                                                       | <b>0.03 (0.12)</b>                                                       | <b>0.0021</b><br><b>(8.4e-03)</b>                                      | <b>4.9e-07</b><br><b>(2.0e-06)</b>                                       | <b>-</b>                                                                      |
| <b>C.</b><br><b>rare pair</b><br><b>score</b><br><i>rare 6-mer</i><br><b>score</b> | <b>1</b>                                                                                                                                              | <b>181</b><br><i>126</i>                                                 | <b>162</b><br><i>107</i>                                                 | <b>152</b><br><i>85</i>                                                | <b>87</b><br><i>46</i>                                                   | <b>1.7e-07 (5.0e-07)</b><br><i>1.8e-08 (5.4e-08)</i>                          |
|                                                                                    | <b>0</b>                                                                                                                                              | <b>858</b><br><i>382</i>                                                 | <b>912</b><br><i>401</i>                                                 | <b>913</b><br><i>425</i>                                               | <b>1048</b><br><i>499</i>                                                | <b>1.0e-06 (3.0e-04)</b><br><i>0.00035 (1.1e-03)</i>                          |
|                                                                                    | <b>-1</b>                                                                                                                                             | <b>218</b><br><i>199</i>                                                 | <b>183</b><br><i>198</i>                                                 | <b>191</b><br><i>196</i>                                               | <b>122</b><br><i>161</i>                                                 | <b>4.4e-06 (1.3e-05)</b><br><i>0.15</i>                                       |
|                                                                                    | <b>Binomial test</b><br><b>on +1 and -1</b><br><b>rare pair</b><br><b>score counts,</b><br><b>P value</b><br><b>(Bonferroni</b><br><b>correction)</b> | <b>0.07</b><br><i>6.1e-05</i><br><i>(2.4e-04)</i>                        | <b>0.28</b><br><i>2.1e-07</i><br><i>(8.4e-07)</i>                        | <b>0.040 (0.16)</b><br><i>3.0e-11</i><br><i>(1.2e-10)</i>              | <b>0.018</b><br><b>(0.072)</b><br><i>3.8e-16</i><br><i>(1.5e-15)</i>     | <b>-</b>                                                                      |
| <b>C.</b><br><b>PARS score</b><br><i>conservative</i><br><i>PARS score</i>         | <b>1</b>                                                                                                                                              | <b>86</b><br><i>301</i>                                                  | <b>72</b><br><i>271</i>                                                  | <b>80</b><br><i>290</i>                                                | <b>57</b><br><i>292</i>                                                  | <b>0.093</b><br><i>0.065</i>                                                  |
|                                                                                    | <b>0</b>                                                                                                                                              | <b>466</b><br><i>0</i>                                                   | <b>509</b><br><i>0</i>                                                   | <b>500</b><br><i>0</i>                                                 | <b>543</b><br><i>0</i>                                                   | <b>0.11</b><br><i>-</i>                                                       |
|                                                                                    | <b>-1</b>                                                                                                                                             | <b>154</b><br><i>405</i>                                                 | <b>125</b><br><i>435</i>                                                 | <b>126</b><br><i>416</i>                                               | <b>107</b><br><i>415</i>                                                 | <b>0.032 (0.096)</b><br><i>0.77</i>                                           |
|                                                                                    | <b>Binomial test</b><br><b>on +1 and -1</b><br><b>rare pair</b><br><b>score counts,</b><br><b>P value</b><br><b>(Bonferroni</b><br><b>correction)</b> | <b>1.3e-05</b><br><b>(5.2e-05)</b><br><i>0.00010</i><br><i>(0.00040)</i> | <b>0.00020</b><br><b>(0.00080)</b><br><i>7.2e-10</i><br><i>(2.9e-09)</i> | <b>0.0017</b><br><b>(0.0068)</b><br><i>2.4e-06</i><br><i>(9.6e-06)</i> | <b>0.00012</b><br><b>(0.00048)</b><br><i>4.2e-06</i><br><i>(1.7e-05)</i> | <b>-</b>                                                                      |

Table S14. Table 1 done again on the non-redundant footprint location set.
